# Supplementary material
Source: Springer Nature journal article supplement (https://www.springermedizin.de/resource/supplementary/12889_2012_4549_MOESM5_ESM.pdf/9492186)

**INTERVENTION (n=43)****GIRLS****CONTROL (n=41)**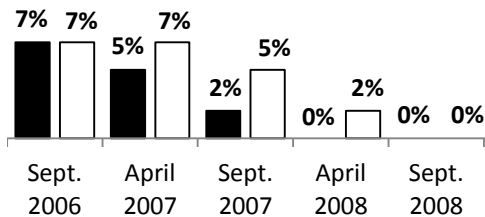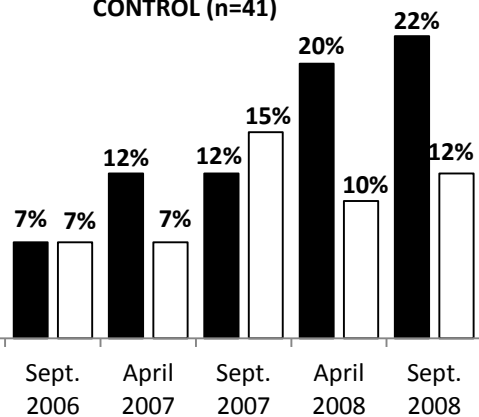**INTERVENTION (n=45)****BOYS****CONTROL (n=47)**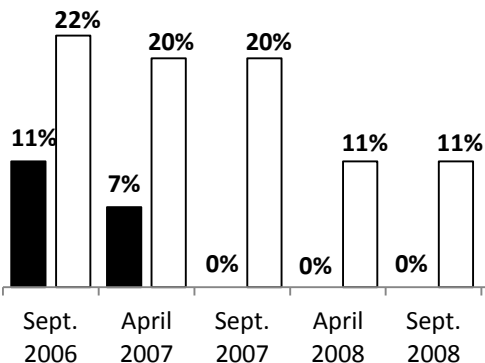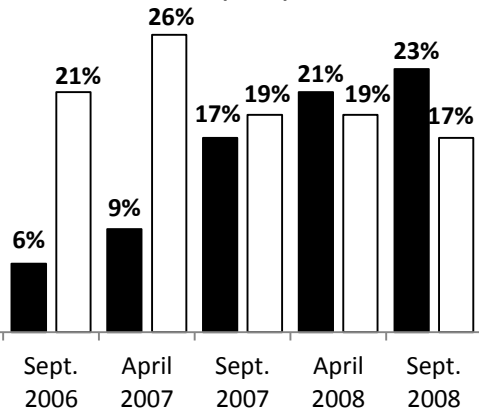

Supplement: MOESM5 [file 9492186]
